# Supplementary material for: Ectopic Expression of Neurod1 Is Sufficient for Functional Recovery following a Sensory–Motor Cortical Stroke
Source: MDPI journal article supplement (doi:10.3390/biomedicines12030663), 2024-03-15
Supplement: s1 [file s1]

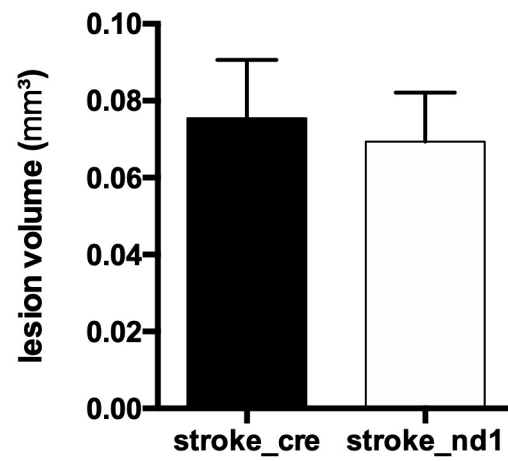

**Supplemental Figure S1. Lesion volume.** Volume (mm<sup>3</sup>) of the lesion was similar between stroke animals that received Neurod1 (stroke\_nd1) and Cre (stroke\_cre) injections.  $p > 0.05$ .  $n = 6-8/\text{group}$ . Data are expressed as mean  $\pm$  SEM.
